# Supplementary material for: In Situ X-ray Absorption Spectroscopy and Droplet-Based Microfluidics: An Analysis of Calcium Carbonate Precipitation
Source: PubMed Central journal article supplement — ACS Meas Sci Au. 2021 Jun 30;1(1):27–34. doi: 10.1021/acsmeasuresciau.1c00005 (PMC9836070; doi:10.1021/acsmeasuresciau.1c00005), 2021-06-30
Supplement: tg1c00005_si_001.pdf [file tg1c00005_si_001.pdf]

## Supplementary Information

### **In-situ X-ray Absorption Spectroscopy and Droplet-Based Microfluidics: An Analysis of Calcium Carbonate Precipitation**

Julie Probst<sup>a</sup>, Camelia Borca<sup>b</sup>, Mark A. Newton<sup>a</sup>, Jeroen van Bokhoven<sup>a,b</sup>, Thomas Huthwelker<sup>b\*</sup>,

Stavros Stavrakis<sup>a</sup> and Andrew deMello<sup>a\*</sup>

(a) Institute for Chemical and Bioengineering, Department of Chemistry and Applied Biosciences, ETH Zürich, Vladimir-Prelog-Weg 1, 8093 Zürich, Switzerland.

(b) Paul Scherrer Institute, 5232 Villigen, Switzerland.

\*e-Mail: [andrew.demello@chem.ethz.ch](mailto:andrew.demello@chem.ethz.ch), [thomas.huthwelker@psi.ch](mailto:thomas.huthwelker@psi.ch)

#### **Table of contents:**

**Figure S1:** Brightfield image of the microfluidic channel.

**Figure S2:** Cross-sectional measurement of Si and Ca XRF, with corresponding XRF spectra at three positions along the line scan.

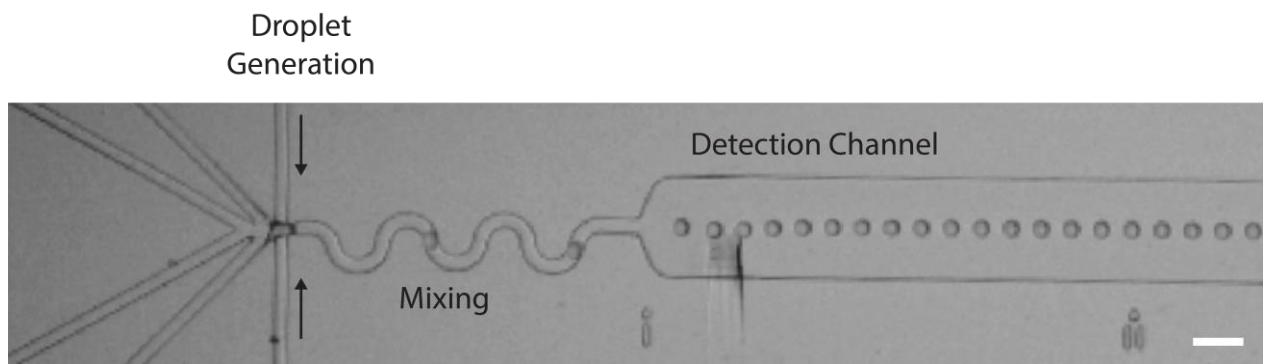

**Figure S1.** Brightfield image of the microfluidic channel taken when inside the measurement chamber and after one scan. Exposure to X-rays results in a visible imprint on the PDMS surface, which appears off-centered due to a parallax from the  $45^\circ$  angle of the incident beam. The shape of the channel is not affected, and the stability of the droplets is not compromised. The scale bar is  $100\ \mu\text{m}$ .

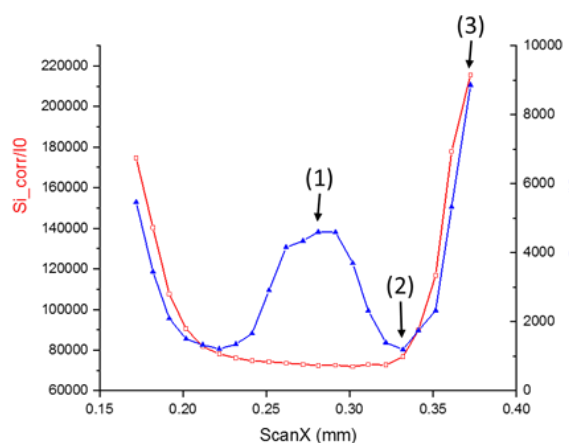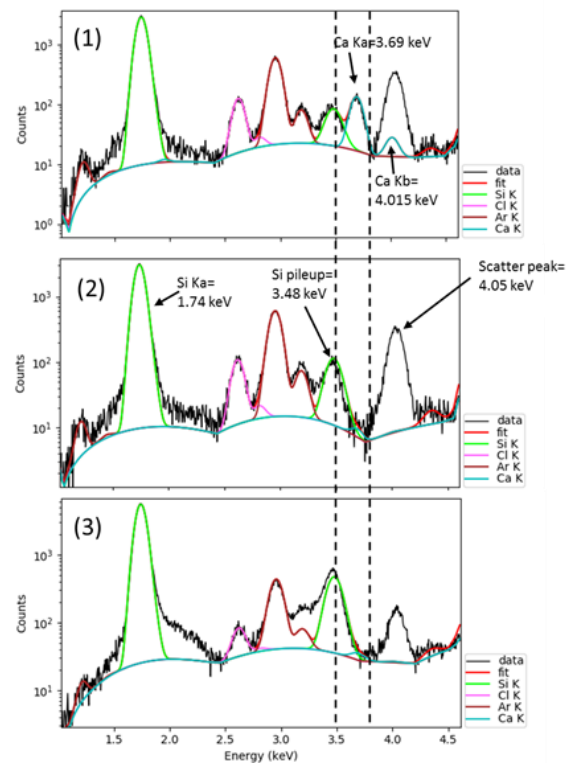

**Figure S2.** Cross-sectional measurement of Si and Ca XRF (perpendicular to the microchannel axis) with droplets containing 20 mM  $\text{Ca}^{2+}$ . The panels on the right show XRF spectra corresponding to three positions along the line scan: position (1) - centered on the droplet stream, position (2) - at the bottom of the channel next to the droplet stream, and position (3) - on the channel wall. The dotted lines highlight the Ca region of interest (ROI) used during the measurements. At position (3), the Si pile-up peak overlaps with the Ca K- $\alpha$  line within the ROI, which explains why the Ca signal is also seen to increase along the channel walls on the cross-sectional scan.
